# Supplementary material for: Influence of Galactooligosaccharides on the Positive Effect of Plant Sterol-Enriched Beverages on Cardiovascular Risk and Sterol Colon Metabolism
Source: PubMed Central journal article supplement (PMC9127961; doi:10.1021/acs.jafc.1c06120), 2022-01-11
Supplement: jf1c06120_si_001.pdf [file jf1c06120_si_001.pdf]

**Figure S1.** Sterol conversion percentages after beverages consumption ( $n = 42$ )

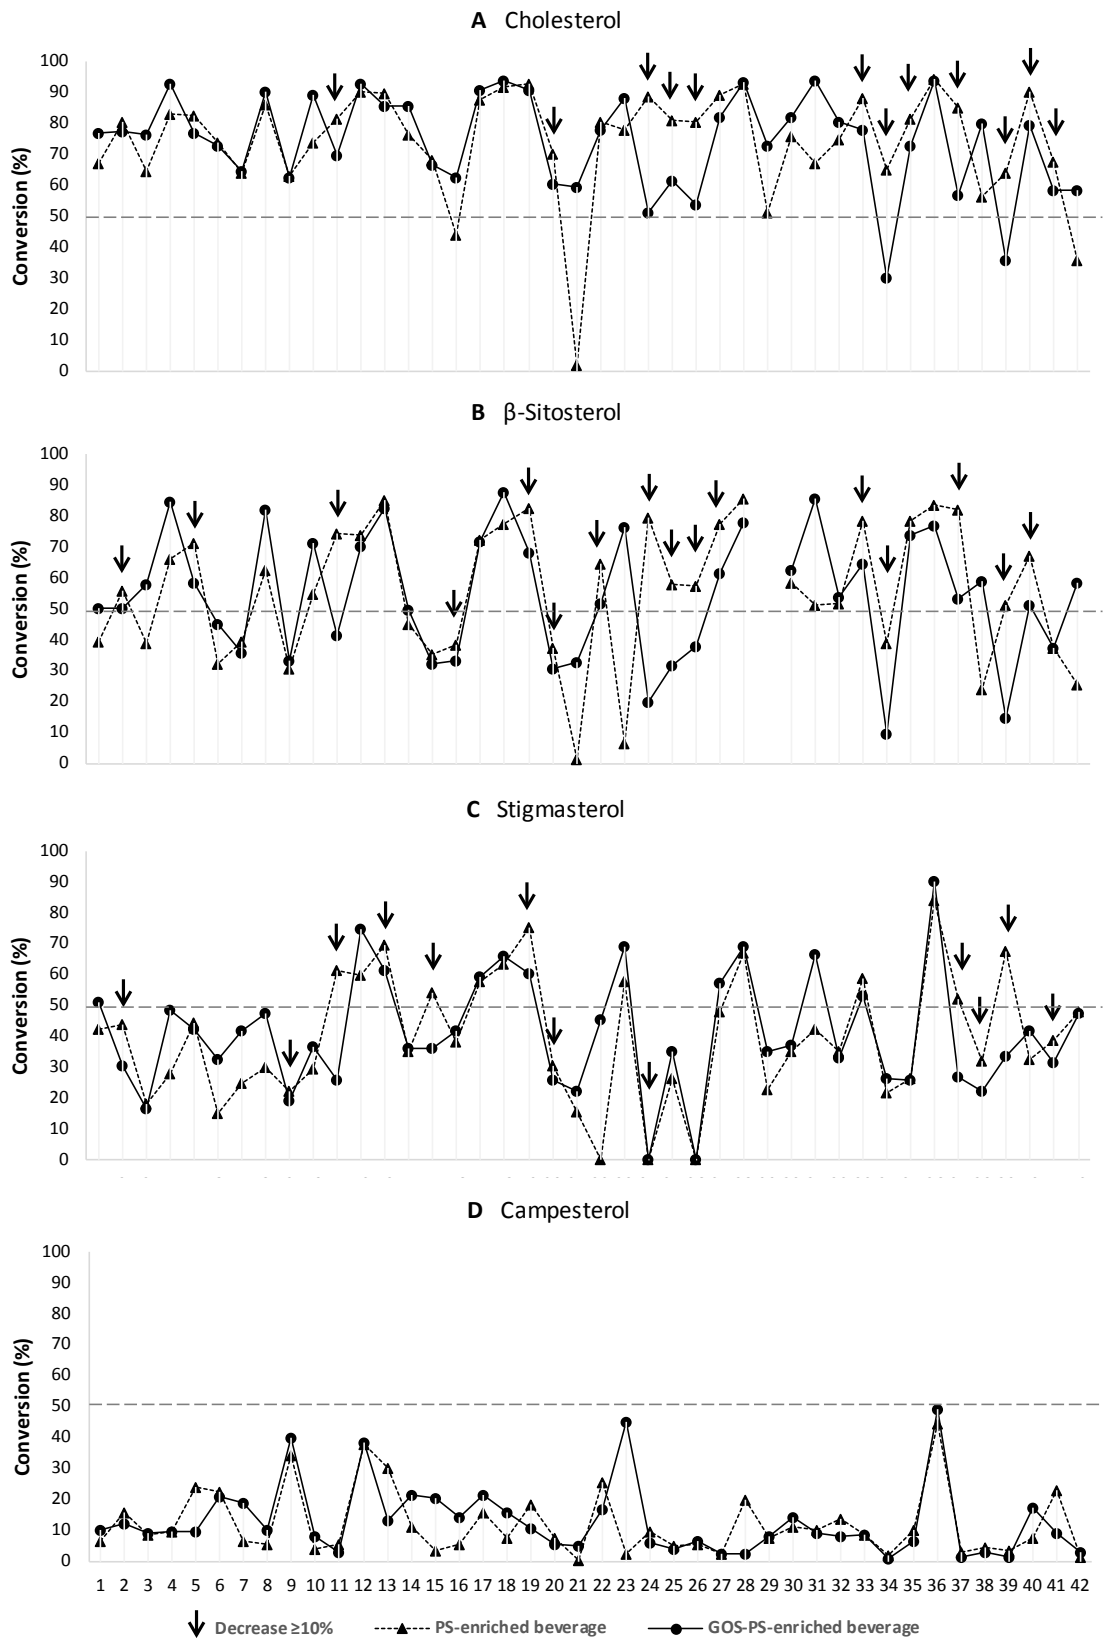

Abscissa axis represents the 42 postmenopausal women from the clinical study, whereas ordinate axis represents the sterol conversion percentage. Cholesterol conversion percentage:  $[\text{coprostanol} + \text{coprostanone}/(\text{cholesterol} + \text{coprostanol} + \text{coprostanone})] \times 100$ .  $\beta$ -Sitosterol conversion percentage:  $[\text{ethylcoprostanol}/(\beta\text{-sitosterol} + \text{sitostanol} + \text{ethylcoprostanol})] \times 100$ .

ethylcoprostanol)] x 100; Stigmasterol conversion percentage: [ethylcoprostenol/(stigmasterol + ethylcoprostenol)] x 100; Campesterol conversion percentage: [methylcoprostanone/(campesterol + campestanol + methylcoprostanone)] x 100. To classify low and high converters, a dashed line was located on each graph indicating the threshold of 50% (according to Wilkins & Hackman, 1974). Black arrows indicate a significant decrease of sterol conversion percentage ( $\geq 10\%$ ) after PS-GOS-enriched beverage intake compared to PS-enriched beverage.
